# Supplementary material
Source: PubMed Central journal article supplement (PMC5648014)

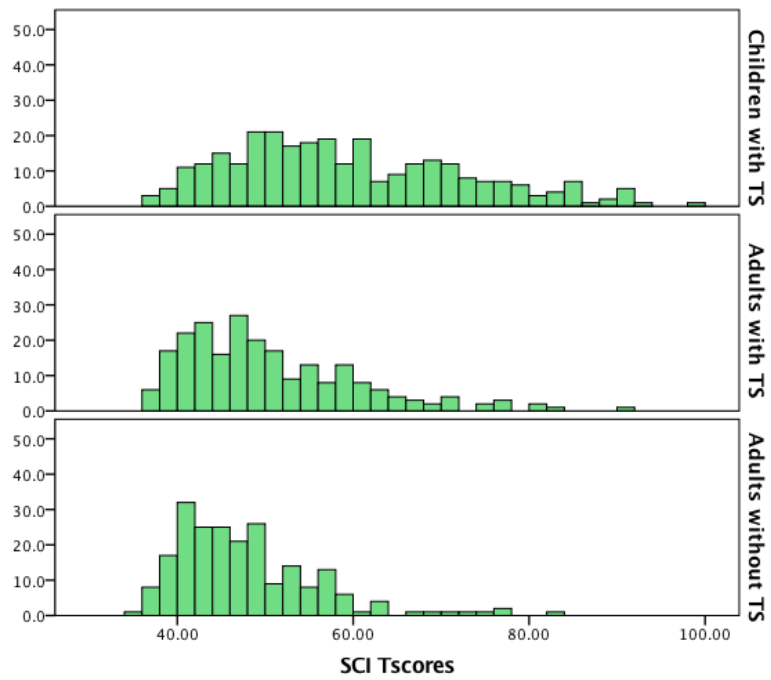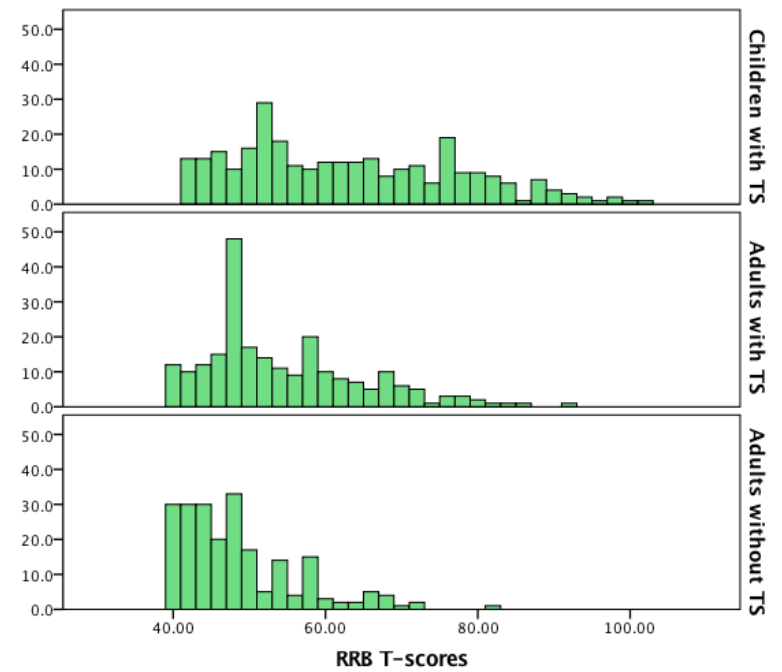

Supplement: NIHMS876386-supplement-s1.pdf [file NIHMS876386-supplement-s1.pdf]
